# Supplementary material for: Variation in waiting times by diagnostic category: an observational study of 1951 referrals to a neurology outpatient clinic
Source: bioRxiv or medRxiv preprint supplement (doi:10.1101/2021.01.12.21249644), 2021-01-13
Supplement: Supplementary file [file media-1.pdf]

# 1 Supplementary Materials

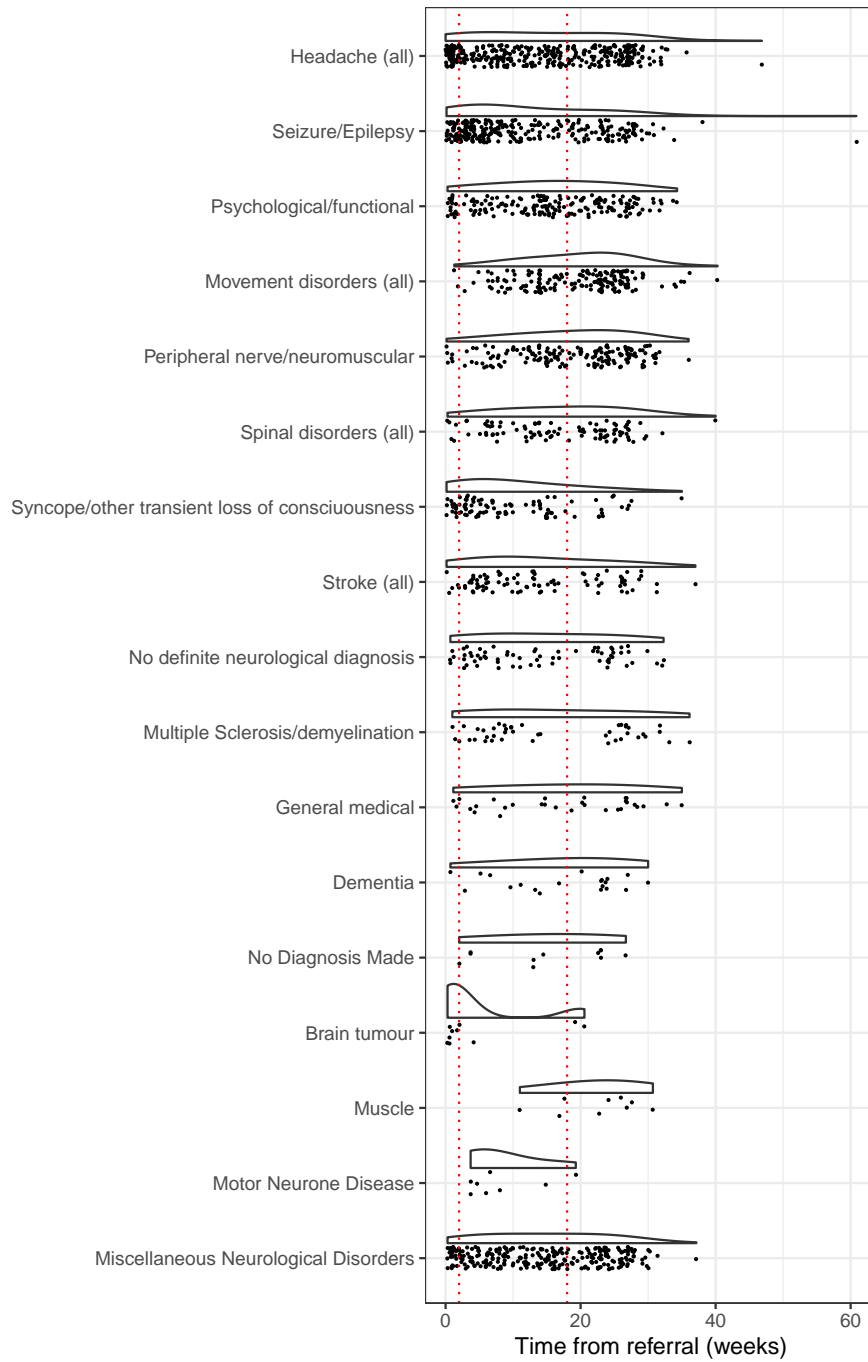

Figure 1: Distribution of waiting time from referral to new appointment including outliers

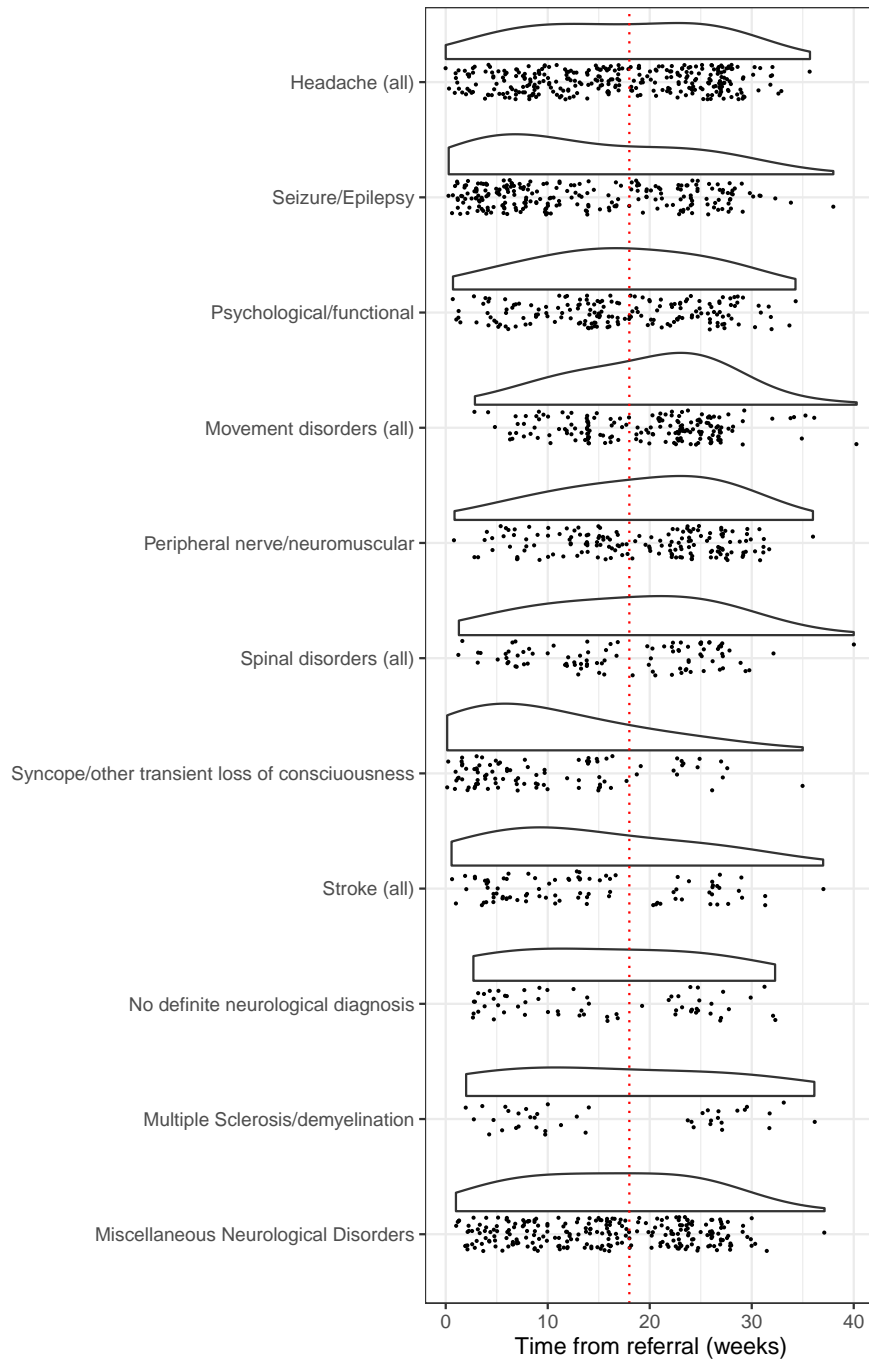

Figure 2: Distribution of waiting time from referral to new appointment after removing patients referred on a 2 week pathway
